# Supplementary material for: Aptamer-Adjusted Carbon Dot Catalysis-Silver Nanosol SERS Spectrometry for Bisphenol A Detection
Source: MDPI journal article supplement (doi:10.3390/nano12081374), 2022-04-17
Supplement: s1 [file s1]

## Supplementary Materials

# Aptamer-Adjusted Carbon Dot Catalysis-Silver Nanosol SERS Spectrometry for Bisphenol A Detection

Yuqi Xie <sup>1</sup>, Lu Ma <sup>1</sup>, Shaoming Ling <sup>1</sup>, Huixiang Ouyang <sup>1,2,\*</sup>, Aihui Liang <sup>2</sup> and Zhiliang Jiang <sup>2,\*</sup>

<sup>1</sup> Key Laboratory of Regional Ecological Environment Analysis and Pollution Control in Western Guangxi (Baise University), Education Department of Guangxi Zhuang Autonomous Region, College of Chemistry and Environment Engineering, Baise University, Baise 533000, China; xiekey@sina.com (Y.X.); malulu2022@163.com (L.M.); lingshaoming@sohu.com (S.L.)

<sup>2</sup> Guangxi Key Laboratory of Environmental Pollution Control Theory and Technology, Guangxi Normal University, Guilin 541004, China; ahliang2008@163.com

\* Correspondence: huixiang73@163.com (H.O.); zljiang@mailbox.gxnu.edu.cn (Z.J.)

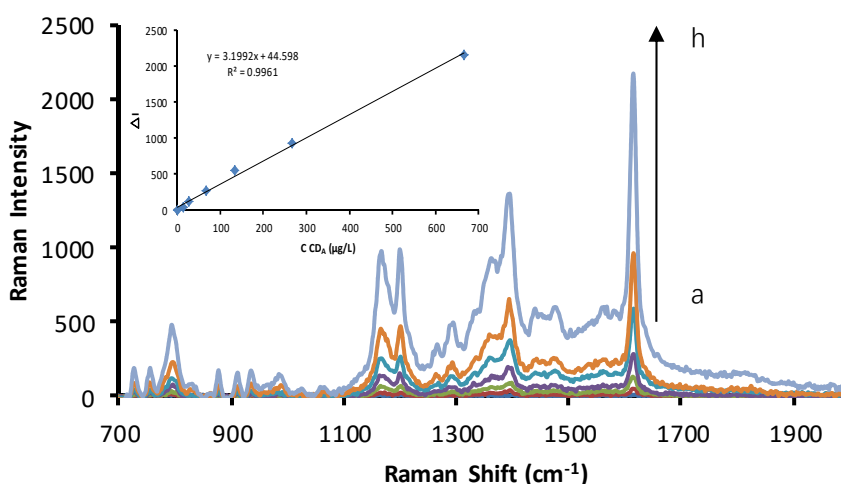

**Figure S1.** SERS spectra of CD-GN- AgNO<sub>3</sub>-trisodium citrate (0, 13.33, 26.67, 66.67, 133.33, 266.67, 666.67 μg/L) CD-GN + 1.33 mmol/L AgNO<sub>3</sub> + 4.67 mmol/L trisodium citrate +85°C+21 min +3.33×10<sup>-7</sup> mol/L VBB+0.02 mol/L NaCl

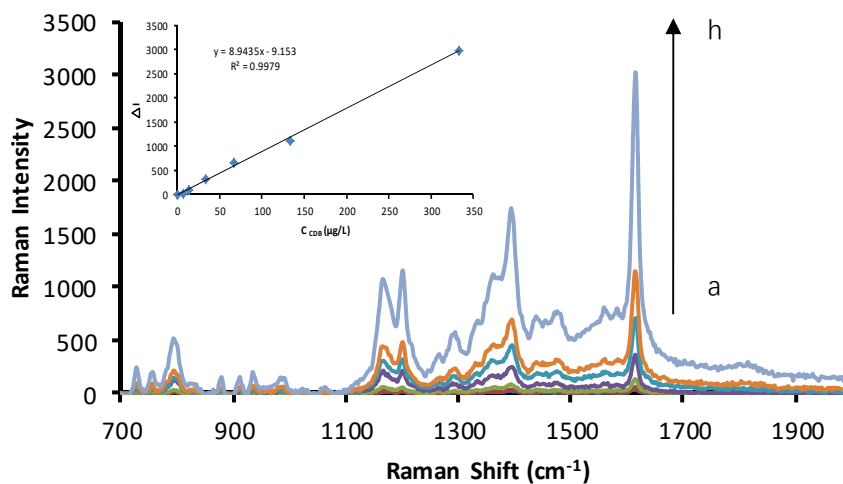

**Figure S2.** SERS spectra of CD<sub>Ca</sub>- AgNO<sub>3</sub>-trisodium citrate (0, 6.67, 13.33, 33.33, 66.67, 133.33, 333.33  $\mu\text{g/L}$ ) CD<sub>Ca</sub> + 1.33 mmol/L AgNO<sub>3</sub>+ 4.67 mmol/L trisodium citrate +85 °C+21 min +3.33 $\times 10^{-7}$  mol/L VBB+0.02 mol/L NaCl

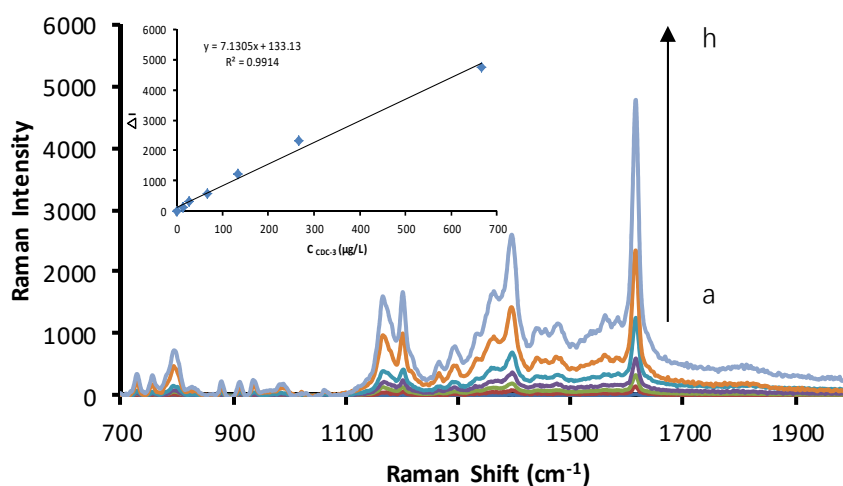

**Figure S3.** SERS spectra of CD-CN- AgNO<sub>3</sub>-trisodium citrate (0, 13.33, 26.67, 66.67, 133.33, 266.67, 666.67  $\mu\text{g/L}$ ) CD-CN<sub>2</sub>+ 1.33 mmol/L AgNO<sub>3</sub> + 4.67 mmol/L trisodium citrate +85 °C+21 min +3.33 $\times 10^{-7}$  mol/L VBB+0.02 mol/L NaCl

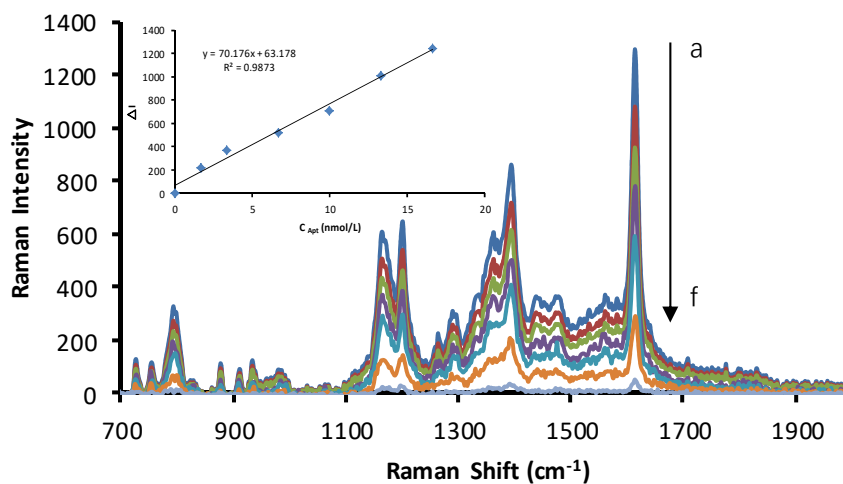

**Figure S4.** SERS spectra of Apt- CD-CN- AgNO<sub>3</sub>-trisodium citrate (0, 1.67, 3.33, 6.67, 10, 13.33, 16.67 nmol/L) Apt + 266.67  $\mu$ g/L CD-CN2 + 1.33 mmol/L AgNO<sub>3</sub>+ 4.67 mmol/L trisodium citrate +85°C+21 min +3.33 $\times 10^{-7}$  mol/L VBB+0.02 mol/L NaCl

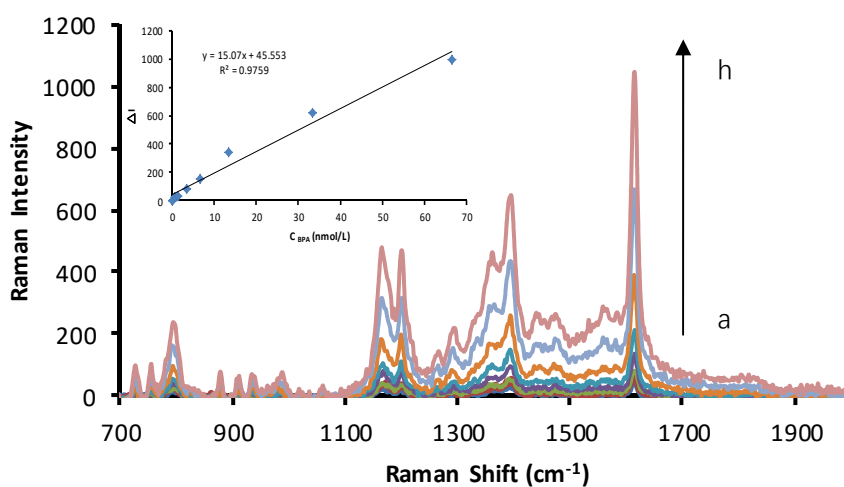

**Figure S5.** SERS spectra of BPA-Apt- CD-GN- AgNO<sub>3</sub>-trisodium citrate 16.67 nmol/L Apt + 266.67  $\mu$ g/L CD-GN + (0, 0.67, 1.33, 3.33, 6.67, 13.33, 33.33, 66.67 nmol/L) BPA + 1.33 mmol/L AgNO<sub>3</sub> + 4.67 mmol/L trisodium citrate +85°C+21 min +3.33 $\times 10^{-7}$  mol/L VBB+0.02 mol/L NaCl

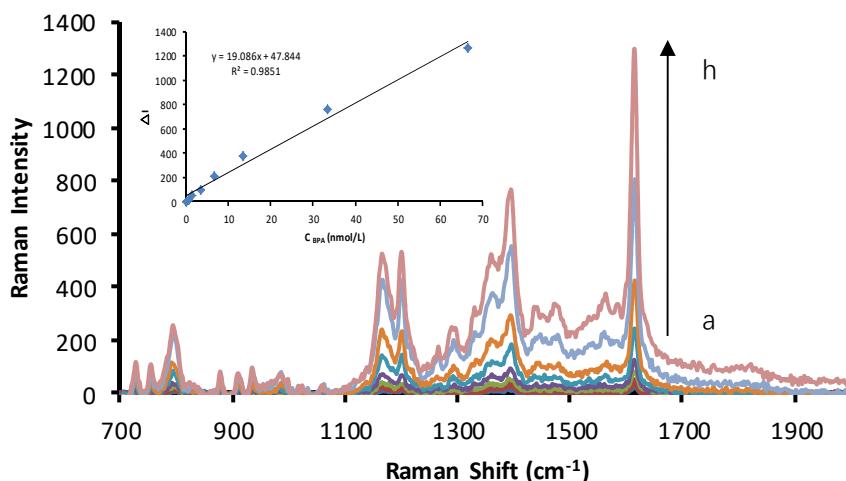

**Figure S6.** SERS spectra of BPA-Apt- CD<sub>Ca</sub>- AgNO<sub>3</sub>-trisodium citrate  
13.33 nmol/L Apt + 133.33 µg/L CD<sub>Ca</sub> + (0, 0.67, 1.33, 3.33, 6.67, 13.33, 33.33, 66.67 nmol/L)  
BPA + 1.33 mmol/L AgNO<sub>3</sub> + 4.67 mmol/L trisodium citrate +85°C+21 min +3.33×10<sup>-7</sup> mol/L  
VBB+0.02 mol/L NaCl

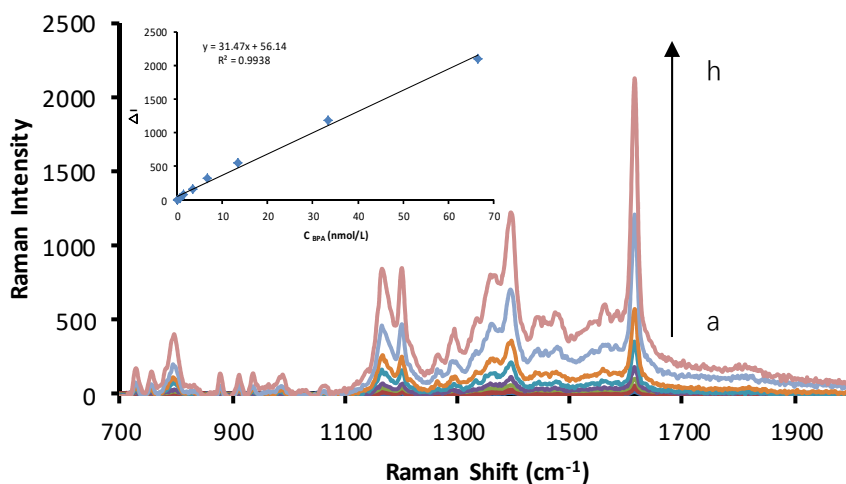

**Figure S7.** SERS spectra of BPA-Apt- CD-CN- AgNO<sub>3</sub>-trisodium citrate  
13.33 nmol/L Apt + 266.67 µg/L CD-CN2 + 0.67-66.67 nmol/L BPA + 1.33 mmol/L AgNO<sub>3</sub> +  
4.67 mmol/L trisodium citrate +85°C+21 min +3.33×10<sup>-7</sup> mol/L VBB+0.02 mol/L NaCl

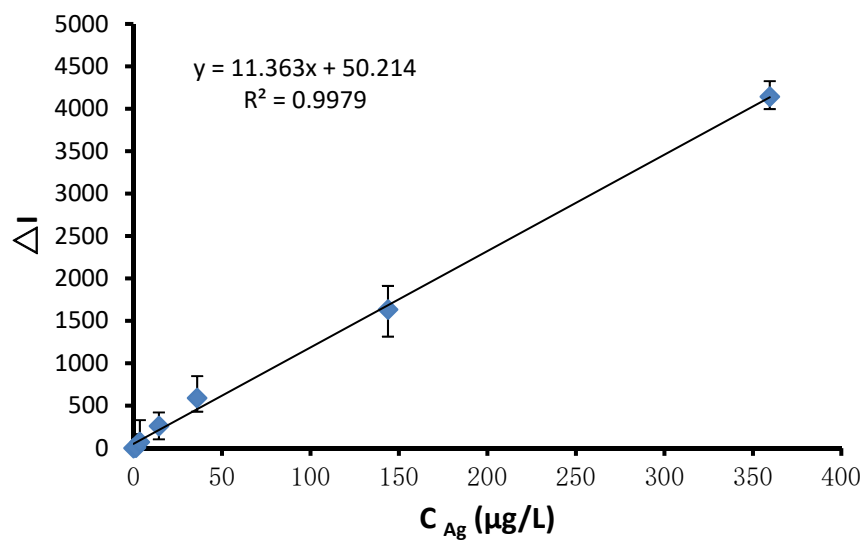

**Figure S8.** The effect of AgNP on SERS intensity

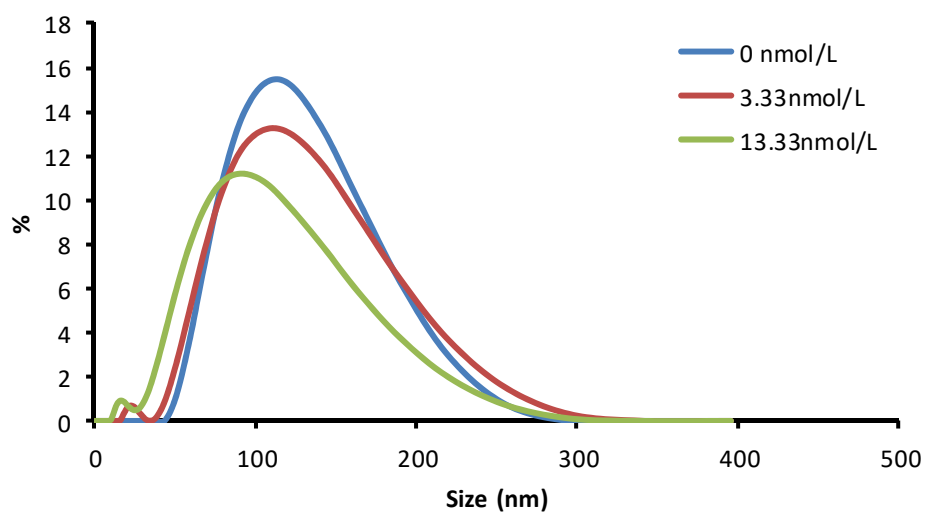

**Figure S9.** Laser scattering image of Apt- CD-FN3 - AgNO<sub>3</sub>-TSC-BPA system  
 20.67 nmol/L Apt + 333.33  $\mu\text{g/L}$  CD-FN3 + 1.33 mmol/L AgNO<sub>3</sub> + 4.67 mmol/L  
 TSC+85°C+21 min; b. a+ 3.33 nmol/L BPA; c. a+ 3.33 nmol/L BPA

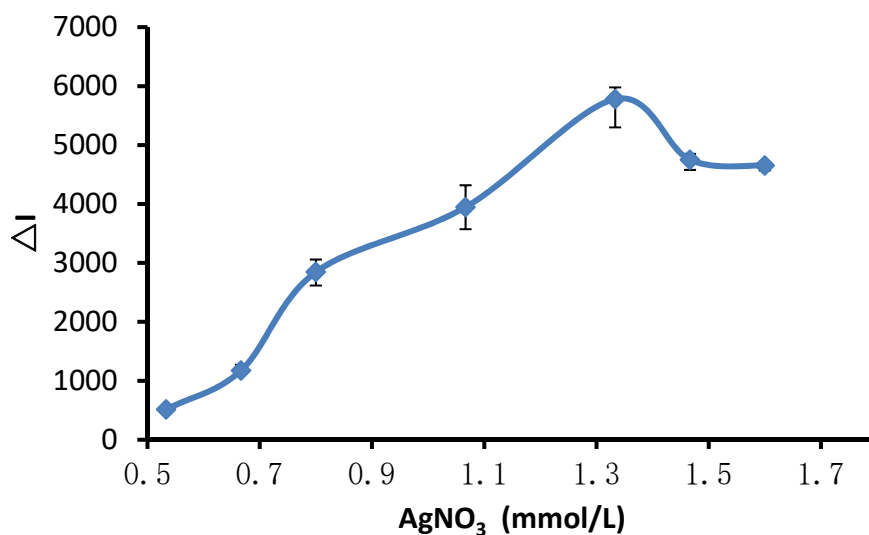

**Figure S10.** Effect of AgNO<sub>3</sub> concentration on the  $\Delta I$  value  
 333.33  $\mu\text{g/L}$  CD-FN3 +x mmol/L AgNO<sub>3</sub>+6.67 mmol/L TSC+85°C+ 21 min +3.33 $\times 10^{-7}$  mol/L  
 VBB+0.02 mol/L NaCl

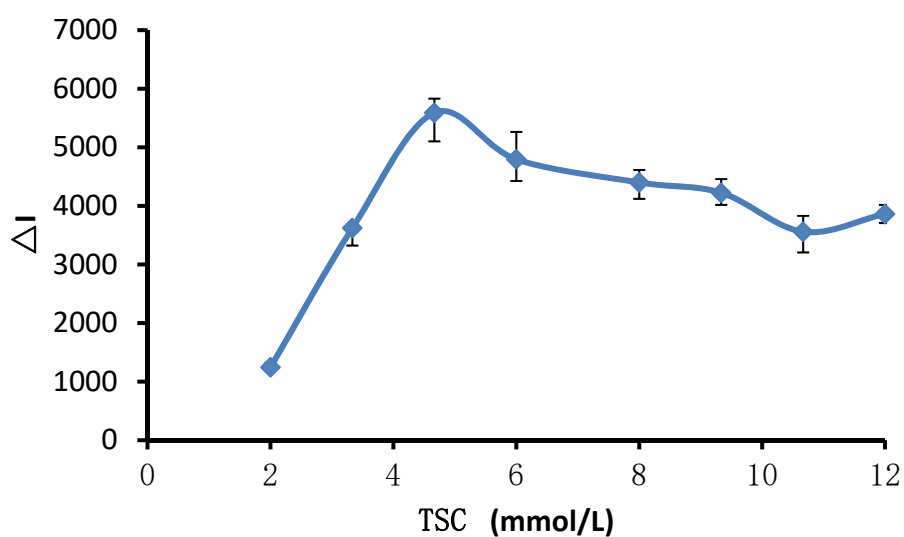

**Figure S11.** Effect of TSC concentration on the  $\Delta I$  value  
 333.33  $\mu\text{g/L}$  CD-FN3 + 1.33 mmol/L AgNO<sub>3</sub>+x mmol/L TSC+85°C+ 21 min +3.33 $\times 10^{-7}$  mol/L  
 VBB+0.02 mol/L NaCl

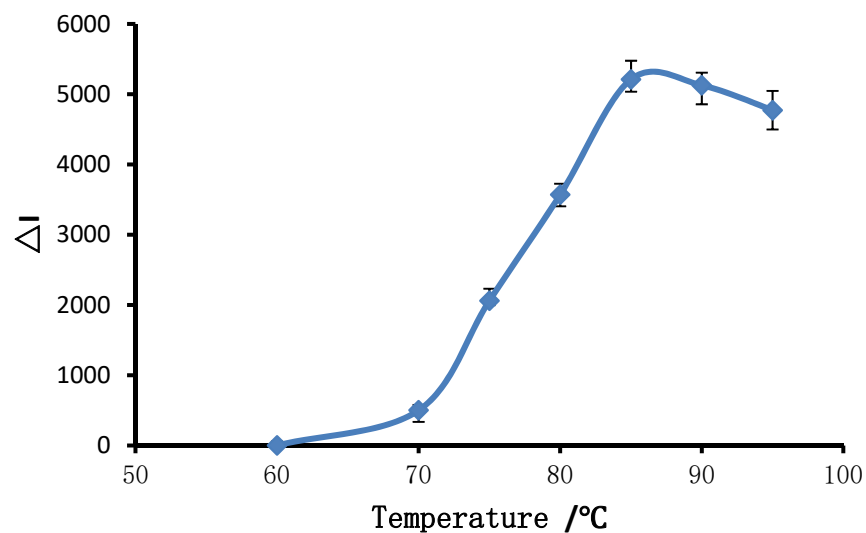

**Figure S12.** Effect of temperature on the  $\Delta I$  value

333.33  $\mu\text{g/L}$  CD-FN3 + 1.33 mmol/L  $\text{AgNO}_3$  + 4.67 mmol/L TSC + x  $^\circ\text{C}$  + 21 min +  $3.33 \times 10^{-7}$  mol/L VBB + 0.02 mol/L NaCl

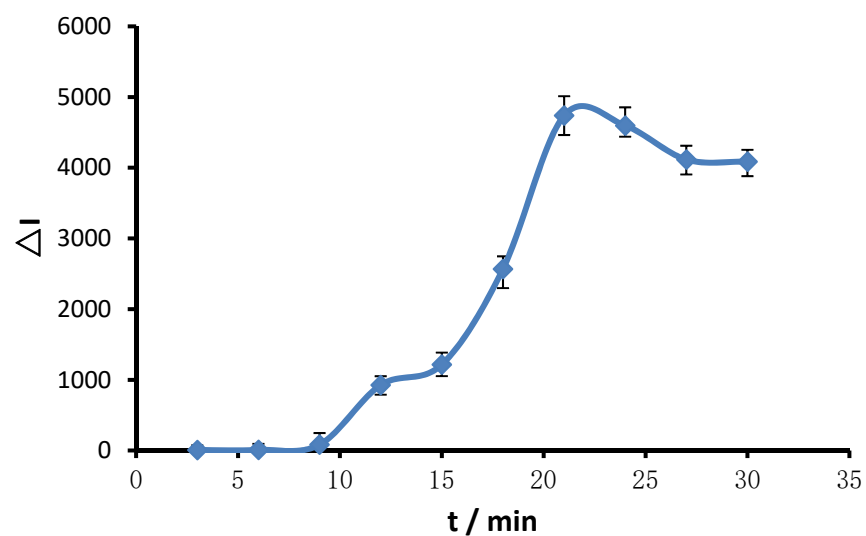

**Figure S13.** Effect of time on the  $\Delta I$  value

333.33  $\mu\text{g/L}$  CD-FN3 + 1.33 mmol/L  $\text{AgNO}_3$  + 4.67 mmol/L TSC + 85 $^\circ\text{C}$  + x min +  $3.33 \times 10^{-7}$  mol/L VBB + 0.02 mol/L NaCl

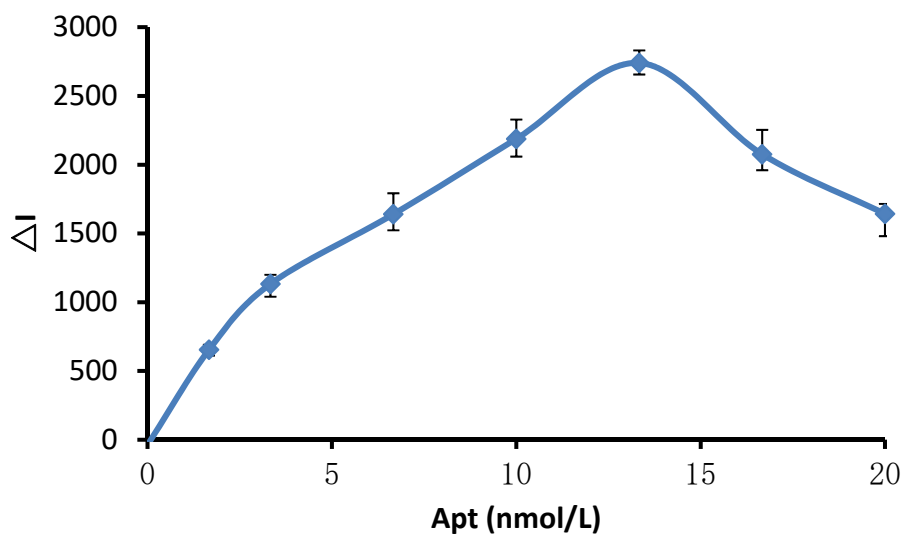

**Figure S14.** Effect of Apt on the  $\Delta I$  value

x nmol/L Apt + 5  $\mu\text{g/L}$  BPA+333.33  $\mu\text{g/L}$  CD-FN3 + 1.33 mmol/L  $\text{AgNO}_3$ + 4.67 mmol/L TSC+85°C+ 21 min +3.33 $\times 10^{-7}$  mol/L VBB+0.02 mol/L NaCl

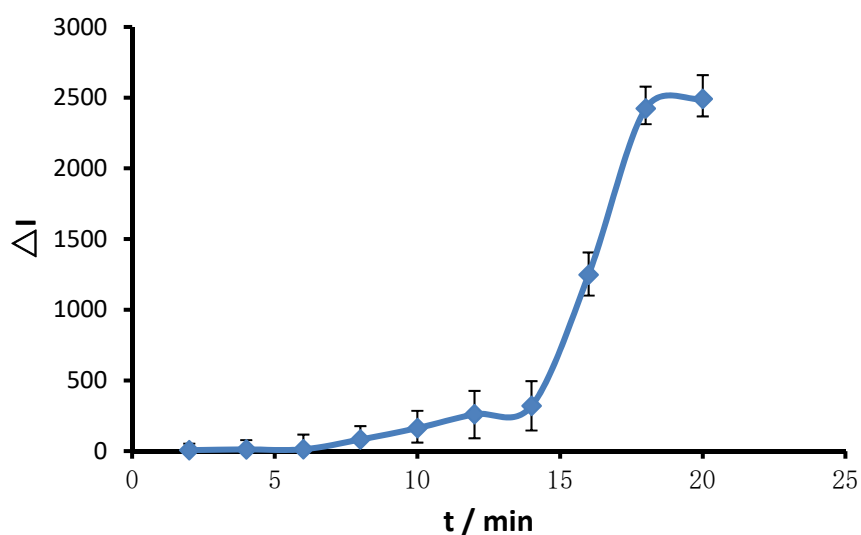

**Figure S15.** Effect of binding time on the  $\Delta I$  value

13.33 nmol/L Apt + 5  $\mu\text{g/L}$  BPA+333.33  $\mu\text{g/L}$  CD-FN3 + 1.33 mmol/L  $\text{AgNO}_3$ + 4.67 mmol/L TSC+85°C+ 21 min +3.33 $\times 10^{-7}$  mol/L VBB+0.02 mol/L NaCl



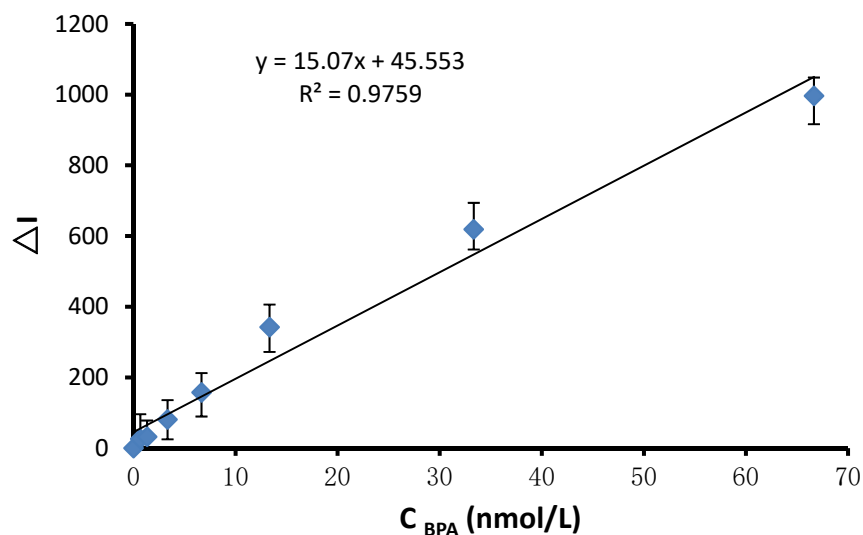

**Figure S16.** Working curve for the SERS determination of Apt-CD-GN-AgNO<sub>3</sub>-TSC-BPA 16.67 nmol/L Apt + 266.67  $\mu$ g/L CD-GN + 0.67-66.67 nmol/L BPA + 1.33 mmol/L AgNO<sub>3</sub>+ 4.67 mmol/L TSC+85°C+21 min +3.33 $\times 10^{-7}$  mol/L VBB+0.02 mol/L NaCl

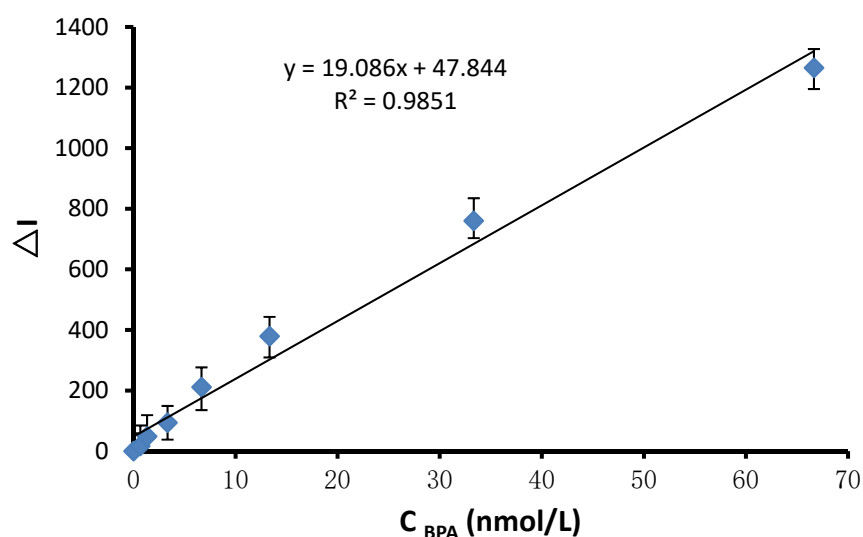

**Figure S17.** Working curve for the SERS determination of Apt-CD<sub>Ca</sub>-AgNO<sub>3</sub>-TSC-BPA 13.33 nmol/L Apt + 133.33  $\mu$ g/L CD<sub>Ca</sub> + 0.67-66.67 nmol/L BPA + 1.33 mmol/L AgNO<sub>3</sub>+ 4.67 mmol/L TSC+85°C+21 min +3.33 $\times 10^{-7}$  mol/L VBB+0.02 mol/L NaCl

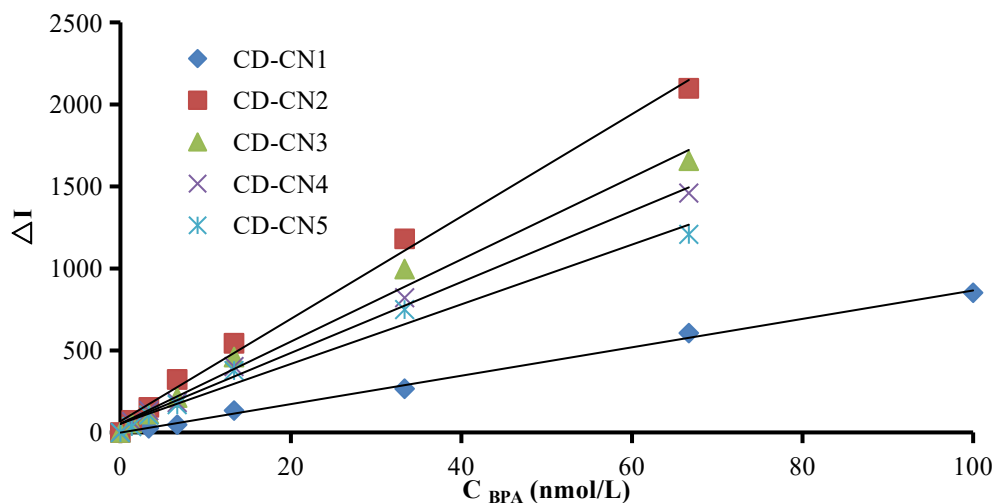

**Figure S18.** Working curve for the SERS determination of Apt-CD<sub>CN</sub>-AgNO<sub>3</sub>-TSC-BPA  
 13.33 nmol/L Apt + CD<sub>CN</sub> + 3.33-100 nmol/L BPA + 1.33 mmol/L AgNO<sub>3</sub>+ 4.67 mmol/L  
 TSC+85°C+21 min +3.33×10<sup>-7</sup> mol/L VBB+0.02 mol/L NaCl

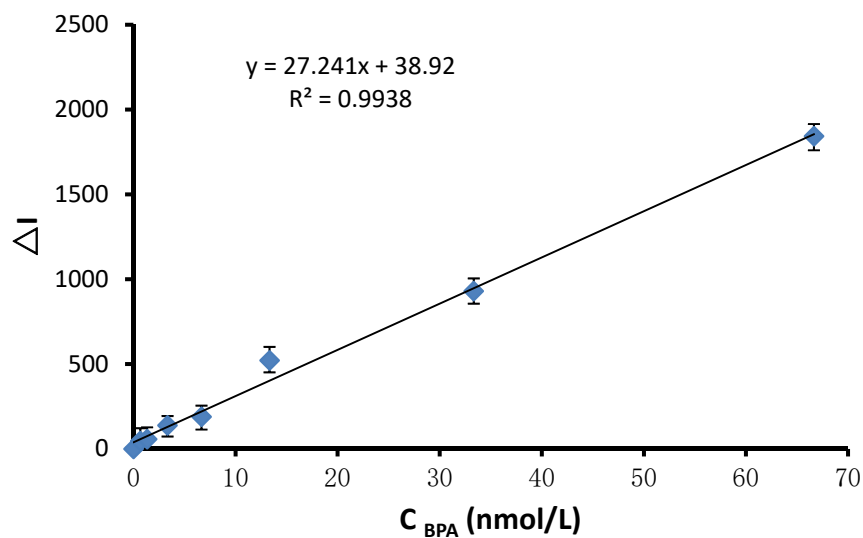

**Figure S19.** Working curve for the SERS determination of Apt- AgNP -AgNO<sub>3</sub>-TSC-BPA  
 6.67 nmol/L Apt + 143.82  $\mu$ g/L AgNP + 0.67-66.67 nmol/L BPA + 1.33 mmol/L AgNO<sub>3</sub>+ 4.67  
 mmol/L TSC+85°C+21 min +3.33×10<sup>-7</sup> mol/L VBB+0.02 mol/L NaCl

**Table S1.** The catalytic effect of various catalyst and the inhibiting effect of Apt

| Nanocatalyst     | Regression equation                       | Linear range                  | Correlation coefficient (R <sup>2</sup> ) |
|------------------|-------------------------------------------|-------------------------------|-------------------------------------------|
| CD-FN0           | $\Delta I_{1614cm-1} = 1.00 C + 66.06$    | 8.33~1666.67 $\mu\text{g/L}$  | 0.985                                     |
| CD-FN1           | $\Delta I_{1614cm-1} = 5.14 C + 89.51$    | 3.33~833.33 $\mu\text{g/L}$   | 0.9848                                    |
| CD-FN2           | $\Delta I_{1614cm-1} = 14.00 C + 12.25$   | 1.67~333.33 $\mu\text{g/L}$   | 0.9995                                    |
| CD-FN3           | $\Delta I_{1614cm-1} = 18.97 C + 15.22$   | 1.67~333.33 $\mu\text{g/L}$   | 0.9985                                    |
| CD-FN4           | $\Delta I_{1614cm-1} = 13.94 C + 62.59$   | 1.67~333.33 $\mu\text{g/L}$   | 0.989                                     |
| CD-FN5           | $\Delta I_{1614cm-1} = 6.71 C + 122.74$   | 8.33~833.33 $\mu\text{g/L}$   | 0.994                                     |
| CD-SN0           | $\Delta I_{1614cm-1} = 0.28 C + 61.53$    | 83.33~8333.33 $\mu\text{g/L}$ | 0.9793                                    |
| CD-SN1           | $\Delta I_{1614cm-1} = 3.41 C + 73.30$    | 8.33~1666.67 $\mu\text{g/L}$  | 0.9982                                    |
| CD-SN2           | $\Delta I_{1614cm-1} = 7.16 C + 207.03$   | 3.33~833.33 $\mu\text{g/L}$   | 0.9772                                    |
| CD-SN3           | $\Delta I_{1614cm-1} = 2.48 C + 112.88$   | 16.67~1666.67 $\mu\text{g/L}$ | 0.9702                                    |
| CD-SN4           | $\Delta I_{1614cm-1} = 2.52 C + 86.61$    | 8.33~1666.67 $\mu\text{g/L}$  | 0.9889                                    |
| CD-SN5           | $\Delta I_{1614cm-1} = 2.29 C + 97.20$    | 8.33~1666.67 $\mu\text{g/L}$  | 0.9627                                    |
| CD <sub>GN</sub> | $\Delta I_{1614cm-1} = 3.2 C + 44.60$     | 13.33~666.67 $\mu\text{g/L}$  | 0.9961                                    |
| CD <sub>Ca</sub> | $\Delta I_{1614cm-1} = 8.94 C - 9.15$     | 6.67~333.33 $\mu\text{g/L}$   | 0.9979                                    |
| CD-CN1           | $\Delta I_{1614cm-1} = 0.39 C + 36.46$    | 70~2800 $\mu\text{g/L}$       | 0.9873                                    |
| CD-CN2           | $\Delta I_{1614cm-1} = 7.13 C + 133.13$   | 13.33~666.67 $\mu\text{g/L}$  | 0.9914                                    |
| CD-CN3           | $\Delta I_{1614cm-1} = 5.44 C - 23.67$    | 13.33~666.67 $\mu\text{g/L}$  | 0.9989                                    |
| CD-CN4           | $\Delta I_{1614cm-1} = 6.30 C + 136.53$   | 13.33~666.67 $\mu\text{g/L}$  | 0.9903                                    |
| CD-CN5           | $\Delta I_{1614cm-1} = 1.77 C + 49.77$    | 13.33~1333.33 $\mu\text{g/L}$ | 0.9946                                    |
| Apt- CN3         | $\Delta I_{1614cm-1} = 70.17 C + 63.18$   | 1.67~16.67 nmol/L             | 0.9873                                    |
| Apt- CD-FN3      | $\Delta I_{1614cm-1} = 387.19 C + 213.08$ | 0.33~10 nmol/L                | 0.9249                                    |
| Apt- CD-SN2      | $\Delta I_{1614cm-1} = 608.81 C + 154.77$ | 0.33~6.67 nmol/L              | 0.9784                                    |
| AgNP             | $\Delta I_{1614cm-1} = 11.36 C + 50.21$   | 1.44~359.56 $\mu\text{g/L}$   | 0.9979                                    |

**Table S2.** Selectivity of the analysis of BPA by the SERS method

| coexistent ion                | Limit times | coexistent ion               | Limit times | coexistent ion | Limit times |
|-------------------------------|-------------|------------------------------|-------------|----------------|-------------|
| CO <sub>3</sub> <sup>2-</sup> | 1200        | K <sup>+</sup>               | 800         | Ethyl alcohol  | 800         |
| Na <sup>+</sup>               | 1000        | Zn <sup>2+</sup>             | 500         | Acetone        | 800         |
| HCO <sub>3</sub> <sup>-</sup> | 600         | Mg <sup>2+</sup>             | 200         | Phenol         | 100         |
| Cl <sup>-</sup>               | 1000        | NO <sub>3</sub> <sup>-</sup> | 800         | HSA            | 10          |
| Br <sup>-</sup>               | 200         | Ca <sup>2+</sup>             | 200         | BSA            | 10          |
| BrO <sub>3</sub> <sup>-</sup> | 100         | Cu <sup>2+</sup>             | 80          | Glycine        | 100         |
| F <sup>-</sup>                | 100         | NH <sub>4</sub> <sup>+</sup> | 400         | Phenylalanine  | 50          |
| Ba <sup>2+</sup>              | 400         | Al <sup>3+</sup>             | 100         | Valine         | 50          |
| Fe <sup>2+</sup>              | 100         | Fe <sup>3+</sup>             | 100         | Tryptophan     | 40          |
| Ni <sup>2+</sup>              | 80          |                              |             | Glutamic acid  | 50          |

**Table S3.** Sample analysis results (n=5)

| Sample                 | Found      |           | Added       | Determination value | Recovery/% |
|------------------------|------------|-----------|-------------|---------------------|------------|
| Plastic film 1         | -          | -         | 3.33 nmol/L | 3.32 nmol/L         | 99.7%      |
| Plastic film 2         | -          | -         | 3.33 nmol/L | 3.36 nmol/L         | 100.9%     |
| Polythene bag 1        | -          | -         | 3.33 nmol/L | 3.40 nmol/L         | 102.1%     |
| Polythene bag 2        | -          | -         | 3.33 nmol/L | 3.28 nmol/L         | 98.5%      |
| unbranded grocery bag  | 2.5 nmol/L | 2.85 mg/g | 3.33 nmol/L | 6.01 nmol/L         | 105.4%     |
| Plastic drinking cup 1 | 1.4 nmol/L | 1.59 mg/g | 3.33 nmol/L | 4.72 nmol/L         | 99.7%      |
| Plastic drinking cup 2 | -          | -         | 3.33 nmol/L | 3.41 nmol/L         | 102.4%     |
